# Supplementary material
Source: publisher site journal article supplement (https://www.dovepress.com/article/558984)
Supplement: Supplementary file 1 [file 558984%20Supplementary%20Material.pdf]

**Table S1. Clinicopathological characteristics of breast cancer patients with RSEM-IPI.**

| <b>Characteristics</b>     | <b>Group 1<br/>[n = 53 (%)]</b> | <b>Group 2<br/>[n = 51 (%)]</b> | <b>P</b> |
|----------------------------|---------------------------------|---------------------------------|----------|
| Age, years                 |                                 |                                 | 0.427    |
| < 45                       | 11 (20.7)                       | 13 (25.5)                       |          |
| ≥45                        | 42 (79.3)                       | 38 (74.5)                       |          |
| BMI (kg/m <sup>2</sup> )   |                                 |                                 | 0.571    |
| <24                        | 29 (54.7)                       | 26 (51.0)                       |          |
| ≥24                        | 24 (45.3)                       | 25 (49.0)                       |          |
| Diabetes                   |                                 |                                 | 0.279    |
| Yes                        | 3 (5.7)                         | 1 (2.0)                         |          |
| No                         | 50 (94.3)                       | 50 (98.0)                       |          |
| Smoking                    |                                 |                                 | 0.593    |
| Yes                        | 4 (7.5)                         | 3 (5.9)                         |          |
| No                         | 49 (92.5)                       | 48 (94.1)                       |          |
| Axillary surgery           |                                 |                                 | 0.839    |
| SLNB                       | 31 (58.5)                       | 29 (56.9)                       |          |
| ALND                       | 22 (41.5)                       | 22 (43.1)                       |          |
| T stage (AJCC 8)           |                                 |                                 | 0.709    |
| Tis or T <sub>1</sub>      | 20 (37.7)                       | 22 (43.1)                       |          |
| T <sub>2</sub>             | 30 (56.6)                       | 27 (52.9)                       |          |
| T <sub>3</sub>             | 3 (5.7)                         | 2 (4.0)                         |          |
| Lymph node status (AJCC 8) |                                 |                                 | 0.777    |
| Negative                   | 28 (52.8)                       | 26 (51.0)                       |          |
| Positive                   | 25 (47.2)                       | 25 (49.0)                       |          |
| Tumor stage                |                                 |                                 | 0.827    |
| 0-I                        | 18 (33.9)                       | 19 (37.2)                       |          |
| II                         | 30 (56.6)                       | 28 (54.9)                       |          |
| III                        | 5 (9.5)                         | 4 (7.9)                         |          |
| Hormone receptor status    |                                 |                                 | 0.511    |
| Negative                   | 13 (24.5)                       | 14 (27.4)                       |          |
| Positive                   | 39 (73.5)                       | 37 (72.6)                       |          |
| Unknown                    | 1 (2.0)                         | 0 (0.0)                         |          |
| Her-2 status               |                                 |                                 | 0.849    |
| Negative                   | 44 (83.0)                       | 43 (84.3)                       |          |
| Positive                   | 9 (17.0)                        | 8 (15.7)                        |          |
| Unknown                    | 0 (0.0)                         | 0 (0.0)                         |          |
| Neoadjuvant chemotherapy   |                                 |                                 | 0.592    |
| Yes                        | 11 (20.7)                       | 9 (17.6)                        |          |
| No                         | 42 (79.3)                       | 42 (82.4)                       |          |
| Adjuvant radiotherapy      |                                 |                                 | 0.570    |
| Yes                        | 30 (56.6)                       | 27 (52.9)                       |          |
| No                         | 23 (43.4)                       | 24 (47.1)                       |          |

BMI, body mass index; SLNB, sentinel lymph node biopsy; ALND, axillary lymph node

dissection. AJCC, American joint of committee on cancer.

**Table S2. The postoperative complications of early-stage breast cancer patients with RSEM-IPI in the different learning phrases.**

| Characteristics                 | Group 1 <i>n</i> (%)      |                           |          | Group 2 <i>n</i> (%)      |                           |          | Phrase 1                  | Phrase 2                  |
|---------------------------------|---------------------------|---------------------------|----------|---------------------------|---------------------------|----------|---------------------------|---------------------------|
|                                 | Phrase 1<br><i>n</i> = 18 | Phrase 2<br><i>n</i> = 35 | <i>P</i> | Phrase 1<br><i>n</i> = 25 | Phrase 2<br><i>n</i> = 24 | <i>P</i> | Group 1 vs. 2<br><i>P</i> | Group 1 vs. 2<br><i>P</i> |
| <b>Bleeding</b>                 | 2 (11.1)                  | 0 (0.0)                   | 0.111    | 5 (20.0)                  | 2 (8.3)                   | 0.189    | 0.719                     | 0.161                     |
| <b>NAC ischemia</b>             | 4 (22.2)                  | 1 (2.8)                   | 0.040    | 5 (20.0)                  | 1 (4.2)                   | 0.417    | 1.000                     | 1.000                     |
| <b>Skin ischemia</b>            | 3 (16.7)                  | 1 (2.8)                   | 0.108    | 5 (20.0)                  | 2 (8.3)                   | 0.417    | 1.000                     | 0.736                     |
| <b>Infection</b>                | 5 (27.8)                  | 3 (8.6)                   | 0.104    | 9 (36.0)                  | 3 (12.5)                  | 0.095    | 0.570                     | 0.959                     |
| <b>Implant loss</b>             | 2 (11.1)                  | 0 (0.0)                   | 0.111    | 4 (16.0)                  | 0 (0.0)                   | 0.110    | 0.992                     | -                         |
| <b>Implant expose</b>           | 4 (22.2)                  | 1 (2.8)                   | 0.040    | 8 (32.0)                  | 3 (12.5)                  | 0.171    | 0.718                     | 0.357                     |
| <b>Drainage duration (days)</b> | 20±5                      | 14±3                      | 0.001    | 23±5                      | 13±4                      | 0.001    | 0.553                     | 0.097                     |

NAC, nipple-areolar complex.
